# Supplementary material
Source: Research Square preprint supplement (doi:10.21203/rs.3.rs-9569436/v1)
Supplement: Supplementary file 1 [file f3235553d6aaf27dc80c47c6.docx]

Supplementary Appendix to the manuscript entitled

**Evidence for asymptomatic TB transmission in HIV- and TB-endemic rural South Africa**

Contents

[**Supplementary Tables** 2](#_Toc227858886)

[Supplementary Table S1: Expanded analysis of demographic and clinical variables 2](#_Toc227858887)

[Supplementary Table S2: Sensitivity analyses of primary and alternate TB definitions 4](#_Toc227858888)

[Supplementary Table S2.1 Sensitivity analysis: clinical characteristics of asymptomatic TB 4](#_Toc227858889)

[Supplementary Table S2.2 Sensitivity analysis: microbiological characteristics of asymptomatic TB 6](#_Toc227858890)

[Supplementary Table S2.3 Sensitivity analysis: radiological characteristics of asymptomatic TB 7](#_Toc227858891)

[Supplementary Table S3: Isolate sequences which revealed mixed infections. 8](#_Toc227858892)

[Supplementary Table S4: Clinical disease phenotype variables related to disease severity and bacillary burden, by lineage. 9](#_Toc227858893)

[Supplementary table S5: Phenotypic drug resistance by lineage. 10](#_Toc227858894)

[Supplementary table S6: Bio-accession numbers of all samples used in this study (n=106), linked to BioProject accession number SRP677838. 10](#_Toc227858895)

[Supplementary table S7: Sequence read archive (SRA) accession numbers (n=160). 11](#_Toc227858896)

[**Supplementary Figures** 14](#_Toc227858897)

[Supplementary Figure S1: Screening characteristics, drug susceptibility profile and bacterial burden of 18 strains with phenotypic drug resistance. 14](#_Toc227858898)

[Supplementary Figure S2: Phylogenetic tree of 102 Vukuzazi isolates embedded within published Mtb genomes from the same geographical region. 15](#_Toc227858899)

[**Vukuzazi Team** 16](#_Toc227858900)

# **Supplementary Tables**

**Supplementary Table S1: Expanded analysis of demographic and clinical variables** **including pair-wise comparisons of participants with clinic diagnosed TB vs no TB, participants with community detected TB vs no TB and participants with community detected TB vs clinic diagnosed TB.**

| Characteristic | Clinic-diagnosed TB  N = 711 | No TB  N = 17,7961 | p-value2 | Community detected TB  N = 1741 | No TB  N = 17,7961 | p-value2 | Clinic-diagnosed TB  N = 711 | Community detected TB  N = 1741 | p-value2 |
| --- | --- | --- | --- | --- | --- | --- | --- | --- | --- |
| Male sex | 31 (44%) | 5,701 (32%) | 0.038 | 80 (46%) | 5,701 (32%) | <0.001 | 31 (44%) | 80 (46%) | 0.700 |
| Age category, years |  |  |  |  |  |  |  |  |  |
| 15-25 | 9 (13%) | 5,259 (30%) | Ref | 29 (17%) | 5,259 (30%) | ref | 9 (13%) | 29 (17%) | ref |
| 26-50 | 45 (63%) | 6,906 (39%) | <0.001 | 69 (40%) | 6,906 (39%) | 0.007 | 45 (63%) | 69 (40%) | 0.082 |
| 50+ | 17 (24%) | 5,631 (32%) | 0.200 | 76 (44%) | 5,631 (32%) | <0.001 | 17 (24%) | 76 (44%) | 0.500 |
| HIV positive | 45 (64%) | 5,975 (34%) | <0.001 | 76 (44%) | 5,975 (34%) | 0.006 | 45 (64%) | 76 (44%) | 0.004 |
| On antiretroviral therapy3 | 40 (89%) | 4,913 (82%) | 0.200 | 61 (80%) | 4,913 (82%) | 0.700 | 40 (89%) | 61 (80%) | 0.200 |
| Undetectable viral load4 | 30 (67%) | 4,741 (79%) | 0.053 | 50 (67%) | 4,741 (79%) | 0.013 | 30 (67%) | 50 (67%) | >0.900 |
| CD4 count, median (IQR) | 357 (253, 581) | 696 (485, 918) | <0.001 | 581 (366, 727) | 696 (485, 918) | 0.008 | 357 (253, 581) | 581 (366, 727) | 0.020 |
| Diabetes mellitus5 | 8 (11%) | 1,705 (9.6%) | 0.600 | 24 (14%) | 1,705 (9.6%) | 0.066 | 8 (11%) | 24 (14%) | 0.600 |
| Previous TB6 | 29 (41%) | 1,935 (11%) | <0.001 | 38 (23%) | 1,935 (11%) | <0.001 | 29 (41%) | 38 (23%) | 0.004 |
| Tobacco use7 | 9 (13%) | 1,263 (7.1%) | 0.073 | 29 (17%) | 1,263 (7.1%) | <0.001 | 9 (13%) | 29 (17%) | 0.400 |
| Any W4SS TB symptom at TB screening8 |  |  |  | 31 (18%) | 1,449 (8.2%) | <0.001 |  |  |  |
| Subjective wellness, EQ-5D-3L8 |  |  |  | 95 (80, 100) | 90 (80, 100) | 0.200 |  |  |  |
| 1n (%); Median (Q1, Q3), 2 Univariate logistic regression, 3Self-reported, 4VL <40, 5HbA1c >6.5 or on treatment for previously diagnosed diabetes, 6reported having previously been treated for TB (not including current episode), 7Self reported current use of cigarettes or tobacco products, 8Not reported for the clinic-diagnosed TB group because duration of TB treatment for current episode varied at the time of the survey. | | | | | | | | | |

## **Supplementary Table S2: Sensitivity analyses of primary and alternate TB definitions**

### Supplementary Table S2.1 Sensitivity analysis: clinical characteristics of asymptomatic TB

|  | Alternative definition 1: Xpert trace only excluded | | | Alternative definition 2: culture positive only | | |
| --- | --- | --- | --- | --- | --- | --- |
|  | Asymptomatic,  n = 100 | Symptomatic,  n = 26 | p | Asymptomatic,  n = 81 | Symptomatic,  n = 21 | p |
| **CLINICAL** |  |  |  |  |  |  |
| Male sex | 49 (49%) | 14 (54%) | 0.700 | 37 (46%) | 11 (52%) | 0.600 |
| Age category |  |  |  |  |  |  |
| 15-25 | 16 (16%) | 2 (7.7%) |  | 14 (17%) | 2 (9.5%) | ref |
| 26-50 | 42 (42%) | 9 (35%) | 0.500 | 34 (42%) | 8 (38%) | 0.600 |
| 50+ | 42 (42%) | 15 (58%) | 0.200 | 33 (41%) | 11 (52%) | 0.300 |
| BMI category |  |  |  |  |  |  |
| Below 18.5 | 7 (7.0%) | 6 (24%) | 0.032 | 6 (7.4%) | 6 (30%) | 0.017 |
| 18.6-24.9 | 59 (59%) | 13 (52%) |  | 46 (57%) | 9 (45%) | ref |
| 25-29.9 | 17 (17%) | 4 (16%) | >0.900 | 15 (19%) | 3 (15%) | >0.900 |
| Over 30 | 17 (17%) | 2 (8.0%) | 0.400 | 14 (17%) | 2 (10%) | 0.700 |
| HIV positive | 41 (41%) | 15 (58%) | 0.130 | 34 (42%) | 12 (57%) | 0.200 |
| Suppressed (VL <40) | 27 (66%) | 9 (60%) |  | 22 (65%) | 6 (50%) | ref |
| Viraemic (VL ≥40) | 14 (34%) | 6 (40%) | 0.700 | 12 (35%) | 6 (50%) | 0.400 |
| CD4 count, median (IQR) | 602 (435, 688) | 586 (350, 782) | 0.700 | 605 (379, 688) | 520 (310, 613) | 0.200 |
| Diabetes mellitus | 8 (8.0%) | 3 (12%) | 0.600 | 7 (8.6%) | 2 (9.5%) | 0.900 |
| Previous TB | 18 (18%) | 9 (35%) | 0.071 | 9 (11%) | 5 (24%) | 0.140 |
| Smokes tobacco | 17 (17%) | 10 (38%) | 0.021 | 13 (16%) | 9 (43%) | 0.011 |
| Alcohol use | 21 (21%) | 9 (35%) | 0.200 | 17 (21%) | 8 (38%) | 0.110 |
| Subjective wellness, EQ-5D-3L | 95 (80, 100) | 80 (70, 94) | 0.013 | 95 (80, 100) | 80 (60, 92) | 0.017 |

### Supplementary Table S2.2 Sensitivity analysis: microbiological characteristics of asymptomatic TB

|  | **Alternative definition 1: Xpert Trace only excluded** | | | **Alternative definition 2: Culture positive only** | | |
| --- | --- | --- | --- | --- | --- | --- |
|  | **Asymptomatic,**  **n = 100** | **Symptomatic,**  **n = 26** | **p** | **Asymptomatic,**  **n = 81** | **Symptomatic,**  **n = 21** | **p** |
| **MICROBIOLOGICAL** |  |  |  |  |  |  |
| Xpert, trace detected | 10 (10%) | 3 (12%) | 0.800 | 10 (12%) | 3 (14%) | 0.800 |
| Xpert, cycle threshold | 28.1 (23.8, 29.7) | 27.9 (24.5, 30.4) | 0.800 | 26.1 (23.0, 29.1) | 25.6 (20.6, 27.2) | 0.600 |
| Culture days-to-positivity | 15.3 (12.6, 17.5) | 16.4 (13.0, 18.2) | 0.800 | 15.3 (12.6, 17.5) | 16.4 (13.0, 18.2) | 0.800 |

### Supplementary Table S2.3 Sensitivity analysis: radiological characteristics of asymptomatic TB

|  | Alternative definition 1: xpert trace only excluded | | | Alternative definition 2: culture positive only | | |
| --- | --- | --- | --- | --- | --- | --- |
|  | **Asymptomatic,**  **n = 100** | **Symptomatic,**  **n = 26** | **p** | **Asymptomatic,**  **n = 81** | **Symptomatic,**  **n = 21** | **p** |
| **RADIOLOGICAL** |  |  |  |  |  |  |
| Automated CXR score | 64 (51, 78) | 67 (58, 87) | 0.300 | 66 (50, 78) | 64 (55, 88) | 0.500 |
| Radiologist interpretation: |  |  |  |  |  |  |
| Abnormal lung fields | 84 (84%) | 22 (85%) | >0.900 | 66 (81%) | 17 (81%) | >0.900 |
| Any cavitation | 23 (23%) | 7 (27%) | 0.700 | 21 (26%) | 6 (29%) | 0.800 |
| Any consolidation | 20 (20%) | 6 (23%) | 0.700 | 17 (21%) | 6 (29%) | 0.500 |
| Any fibrosis | 50 (50%) | 15 (58%) | 0.500 | 41 (51%) | 12 (57%) | 0.600 |
| Any nodules | 61 (61%) | 12 (46%) | 0.200 | 48 (59%) | 10 (48%) | 0.300 |
| Any calcification | 1 (1.0%) | 5 (19%) | 0.005 | 0 (0%) | 4 (19%) | >0.900 |

## **Supplementary Table S3: Isolate sequences which revealed mixed infections.**

| **Specimen ID** | **MTBC lineage(s)** | **Symptom status** | **Drug resistance category** |
| --- | --- | --- | --- |
| 313502215 | Lineage 4.9  Lineage 4.2.2.2 | Asymptomatic | Sensitive |
| 313506006 | Lineage 2.2.1  Lineage 4.4.1.1 | Asymptomatic | Sensitive |
| 313510329 | Lineage 1.1.3.2  Lineage 4.4.1.1.1 | Asymptomatic | Sensitive |

## **Supplementary Table S4: Clinical disease phenotype variables related to disease severity and bacillary burden, by lineage.**

|  | **Lineage 11**  **n=8** | **Lineage 21**  **n=36** | **Lineage 31**  **n=4** | **Lineage 41**  **n=57** | **p-value2** |
| --- | --- | --- | --- | --- | --- |
| HIV positive | 3 (38%) | 14 (40%) | 2 (50%) | 30 (54%) | 0.600 |
| Prior TB treatment | 1 (12%) | 6 (17%) | 2 (50%) | 5 (8.9%) | 0.400 |
| *Disease severity* | | | | | |
| Symptomatic | 2 (25%) | 7 (19%) | 1 (25%) | 14 (25%) | >0.900 |
| CXR score | 80 (65,92) | 62 (42,78) | 55 (49,69) | 69 (54,80) | 0.300 |
| Cavitation | 1 (12%) | 12 (33%) | 0 (0%) | 16 (28%) | 0.500 |
| Consolidation | 1 (12%) | 8 (22%) | 1 (25%) | 14 (25%) | >0.900 |
| *Bacillary burden* | | | | | |
| Culture time to detection (days) | 17.5 (14.8,20,0) | 15.0 (13.0,17.0) | 13.0 (11.8,17.0) | 14.0 (11.8,18.0) | 0.500 |
| Xpert trace detected | 1 (12%) | 4 (11%) | 1 (25%) | 7 (12%) | >0.900 |

1n (%); Median (IQR)

2Fisher's exact test; Kruskal-Wallis rank sum test

## **Supplementary table S5: Phenotypic drug resistance by lineage.**

|  | **Lineage 1**  **n=8** | **Lineage 2**  **n=36** | **Lineage 3**  **n=4** | **Lineage 4**  **n=57** | **p-value** |
| --- | --- | --- | --- | --- | --- |
| Phenotypic drug resistance | 2 (25%) | 3 (8.3%) | 1. (25%) | 13(23%) | >0.900 |

## **Supplementary table S6: Bio-accession numbers of all samples used in this study (n=106), linked to BioProject accession number SRP677838.**

| SAMN55333290 | SAMN55333291 | SAMN55333292 |
| --- | --- | --- |
| SAMN55333293 | SAMN55333294 | SAMN55333295 |
| SAMN55333296 | SAMN55333297 | SAMN55333298 |
| SAMN55333299 | SAMN55333300 | SAMN55333301 |
| SAMN55333302 | SAMN55333303 | SAMN55333304 |
| SAMN55333305 | SAMN55333306 | SAMN55333307 |
| SAMN55333308 | SAMN55333309 | SAMN55333310 |
| SAMN55333311 | SAMN55333312 | SAMN55333313 |
| SAMN55333314 | SAMN55333315 | SAMN55333316 |
| SAMN55333317 | SAMN55333318 | SAMN55333319 |
| SAMN55333320 | SAMN55333321 | SAMN55333322 |
| SAMN55333323 | SAMN55333324 | SAMN55333325 |
| SAMN55333326 | SAMN55333327 | SAMN55333328 |
| SAMN55333329 | SAMN55333330 | SAMN55333331 |
| SAMN55333332 | SAMN55333333 | SAMN55333334 |
| SAMN55333335 | SAMN55333336 | SAMN55333337 |
| SAMN55333338 | SAMN55333339 | SAMN55333340 |
| SAMN55333341 | SAMN55333342 | SAMN55333343 |
| SAMN55333344 | SAMN55333345 | SAMN55333346 |
| SAMN55333347 | SAMN55333348 | SAMN55333349 |
| SAMN55333350 | SAMN55333351 | SAMN55333352 |
| SAMN55333353 | SAMN55333354 | SAMN55333355 |
| SAMN55333356 | SAMN55333357 | SAMN55333358 |
| SAMN55333359 | SAMN55333360 | SAMN55333361 |
| SAMN55333362 | SAMN55333363 | SAMN55333364 |
| SAMN55333365 | SAMN55333366 | SAMN55333367 |
| SAMN55333368 | SAMN55333369 | SAMN55333370 |
| SAMN55333371 | SAMN55333372 | SAMN55333373 |
| SAMN55333374 | SAMN55333375 | SAMN55333376 |
| SAMN55333377 | SAMN55333378 | SAMN55333379 |
| SAMN55333380 | SAMN55333381 | SAMN55333382 |
| SAMN55333383 | SAMN55333384 | SAMN55333385 |
| SAMN55333386 | SAMN55333387 | SAMN55333388 |
| SAMN55333389 | SAMN55333390 | SAMN55333391 |
| SAMN55333392 | SAMN55333393 | SAMN55333394 |
| SAMN55333395 |  |  |

## **Supplementary table S7: Sequence read archive (SRA) accession numbers (n=160).**

| SRR37267330 | SRR37267329 | SRR37267258 |
| --- | --- | --- |
| SRR37267247 | SRR37267236 | SRR37267225 |
| SRR37267214 | SRR37267203 | SRR37267192 |
| SRR37267181 | SRR37267328 | SRR37267317 |
| SRR37267306 | SRR37267295 | SRR37267284 |
| SRR37267273 | SRR37267262 | SRR37267261 |
| SRR37267260 | SRR37267259 | SRR37267257 |
| SRR37267256 | SRR37267255 | SRR37267254 |
| SRR37267253 | SRR37267252 | SRR37267251 |
| SRR37267250 | SRR37267249 | SRR37267248 |
| SRR37267246 | SRR37267245 | SRR37267244 |
| SRR37267243 | SRR37267242 | SRR37267241 |
| SRR37267240 | SRR37267239 | SRR37267238 |
| SRR37267237 | SRR37267235 | SRR37267234 |
| SRR37267233 | SRR37267232 | SRR37267231 |
| SRR37267230 | SRR37267229 | SRR37267228 |
| SRR37267227 | SRR37267226 | SRR37267224 |
| SRR37267223 | SRR37267222 | SRR37267221 |
| SRR37267220 | SRR37267219 | SRR37267218 |
| SRR37267217 | SRR37267216 | SRR37267215 |
| SRR37267213 | SRR37267212 | SRR37267211 |
| SRR37267210 | SRR37267209 | SRR37267208 |
| SRR37267207 | SRR37267206 | SRR37267205 |
| SRR37267204 | SRR37267202 | SRR37267201 |
| SRR37267200 | SRR37267199 | SRR37267198 |
| SRR37267197 | SRR37267196 | SRR37267195 |
| SRR37267194 | SRR37267193 | SRR37267191 |
| SRR37267190 | SRR37267189 | SRR37267188 |
| SRR37267187 | SRR37267186 | SRR37267185 |
| SRR37267184 | SRR37267183 | SRR37267182 |
| SRR37267180 | SRR37267179 | SRR37267178 |
| SRR37267177 | SRR37267176 | SRR37267175 |
| SRR37267174 | SRR37267173 | SRR37267172 |
| SRR37267171 | SRR37267327 | SRR37267326 |
| SRR37267325 | SRR37267324 | SRR37267323 |
| SRR37267322 | SRR37267321 | SRR37267320 |
| SRR37267319 | SRR37267318 | SRR37267316 |
| SRR37267315 | SRR37267314 | SRR37267313 |
| SRR37267312 | SRR37267311 | SRR37267310 |
| SRR37267309 | SRR37267308 | SRR37267307 |
| SRR37267305 | SRR37267304 | SRR37267303 |
| SRR37267302 | SRR37267301 | SRR37267300 |
| SRR37267299 | SRR37267298 | SRR37267297 |
| SRR37267296 | SRR37267294 | SRR37267293 |
| SRR37267292 | SRR37267291 | SRR37267290 |
| SRR37267289 | SRR37267288 | SRR37267287 |
| SRR37267286 | SRR37267285 | SRR37267283 |
| SRR37267282 | SRR37267281 | SRR37267280 |
| SRR37267279 | SRR37267278 | SRR37267277 |
| SRR37267276 | SRR37267275 | SRR37267274 |
| SRR37267272 | SRR37267271 | SRR37267270 |
| SRR37267269 | SRR37267268 | SRR37267267 |
| SRR37267266 | SRR37267265 | SRR37267264 |
| SRR37267263 |  |  |

# **Supplementary Figures**

## **Supplementary Figure S1: Screening characteristics, drug susceptibility profile and bacterial burden of 18 strains with phenotypic drug resistance.**


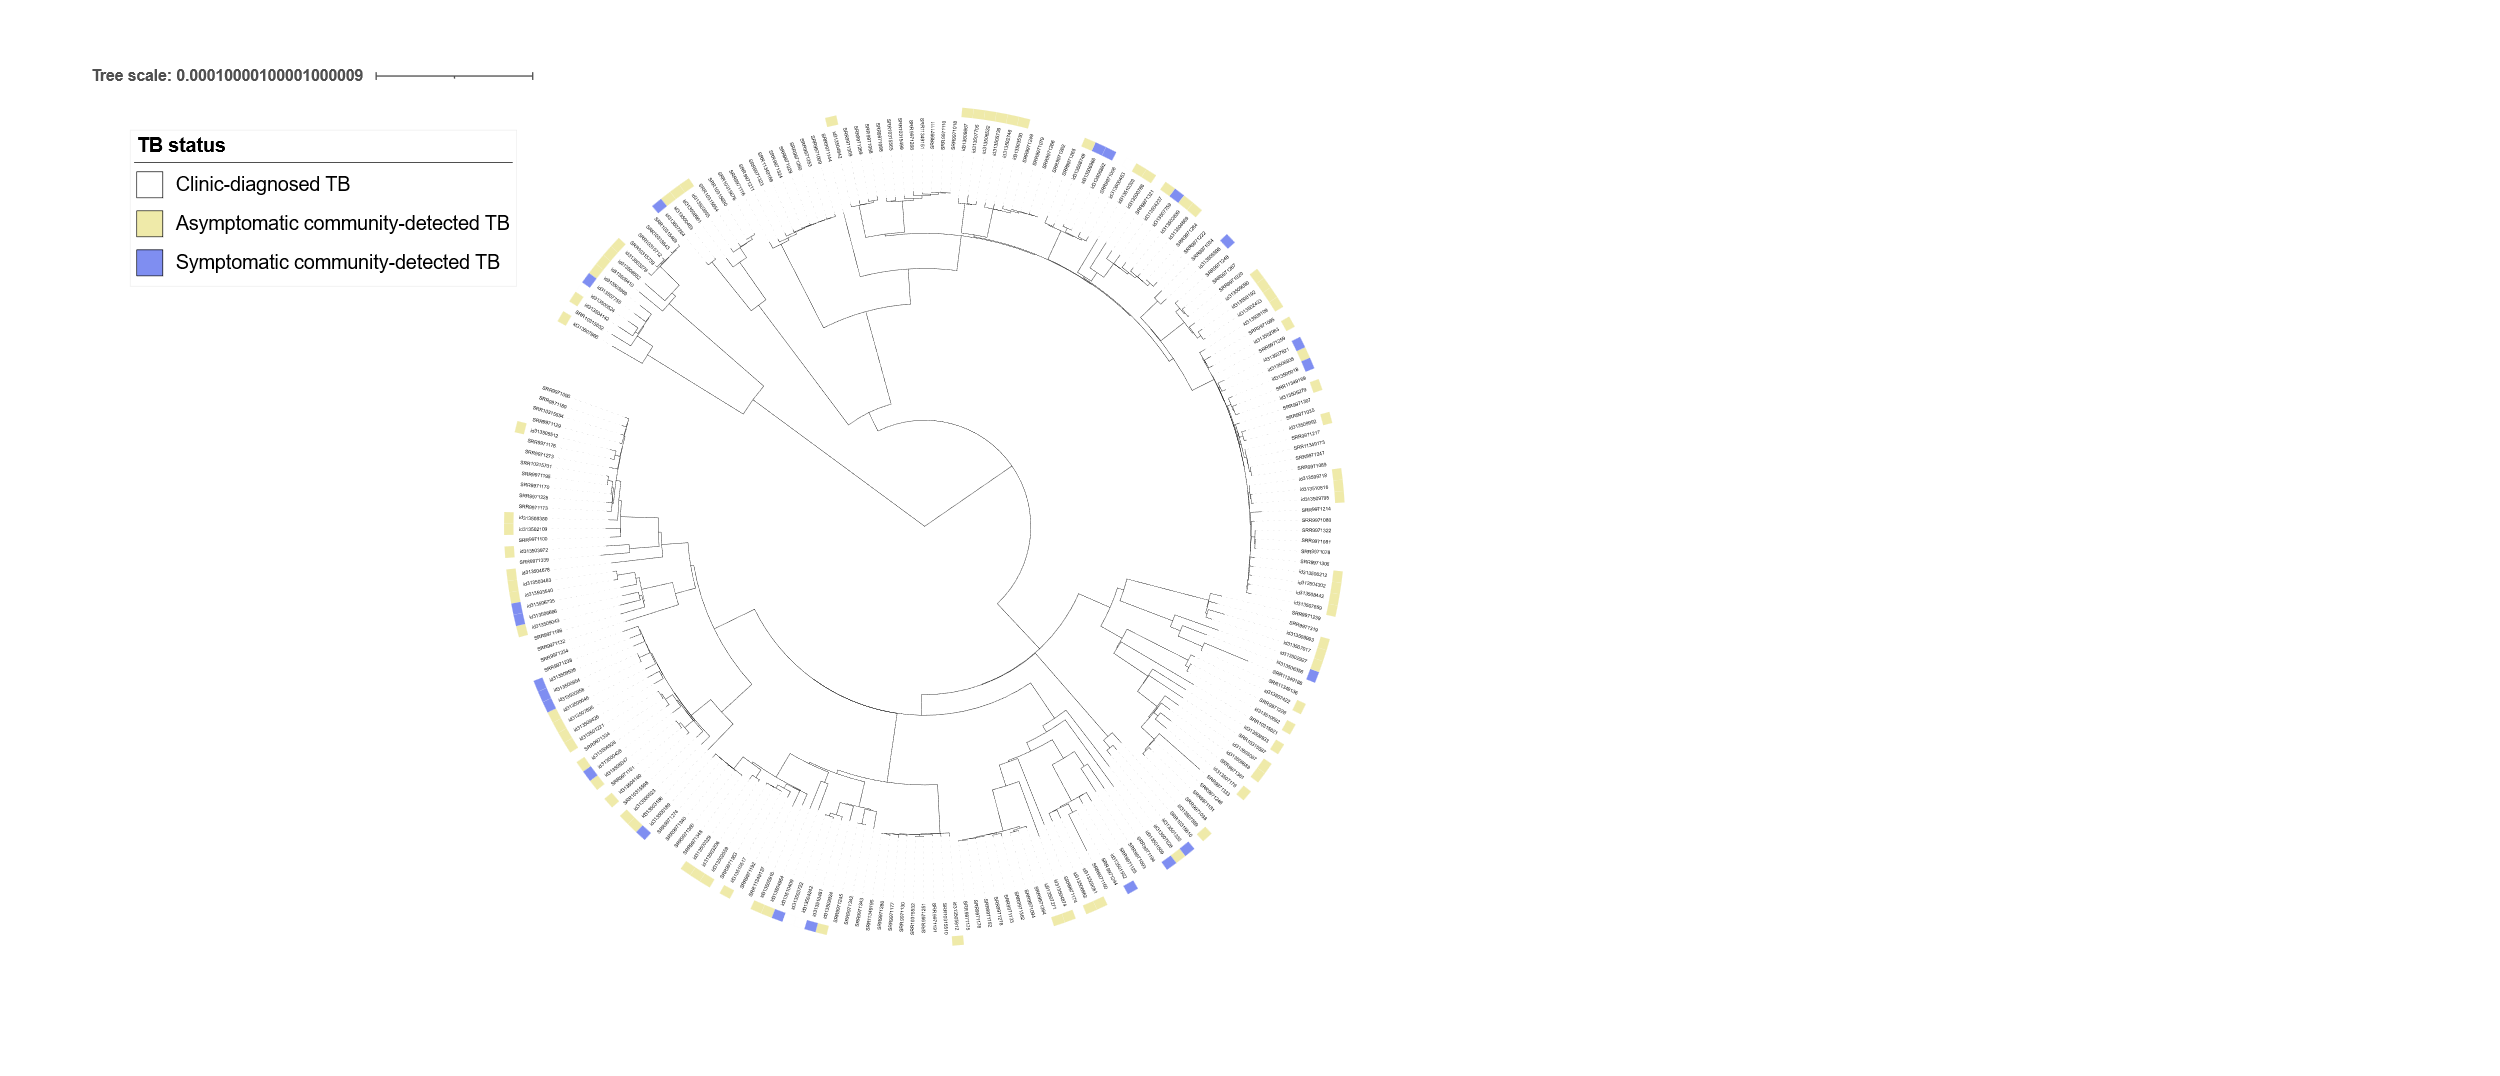


## **Supplementary Figure S2: Phylogenetic tree of 102 Vukuzazi isolates embedded within published Mtb genomes from the same geographical region.**

# **Vukuzazi Team**

Vukuzazi Team: Staff who significantly contributed to the implementation and conduct of

Vukuzazi.

***** Denotes team members who were closely involved with the design, implementation and

oversight of Vukuzazi.

| **Name** | **Role** |
| --- | --- |
| *Deenan Pillay | Principal Investigator (2017-2019) |
| *Willem Hanekom | Principal Investigator (2019-present) |
| *Emily Wong | Co-Principal Investigator |
| *Mark Siedner | Co-Principal Investigator |
| *Olivier Koole | Co-Principal Investigator (2017-2019) |
| *Thumbi Ndung’u | Co-investigator |
| *Thandeka Khoza | Co-investigator (2019-present) |
| *Kobus Herbst | Co-investigator |
| *Kathy Baisley | Co-investigator |
| *Janet Seeley | Co-investigator |
| *Alison Grant | Co-investigator |
| *Resign Gunda | Programme Manager |
| *Ashmika Surujdeen | Study Coordinator |
| *Theresa Smit | Head: Diagnostic Research |
| *Dickman Gareta | Head: Research Data Management |
| *Day Munatsi | Head: Research Data Systems |
| *Ngcebo Mhlongo | Study Physician |
| *Sanah Bucibo | Lead Nurse |
| *Tshwaraganang Modise | Research Data Manager |
| *Stephen Olivier | Statistician |
| *Gregory Ording-Jespersen | Laboratory Data Supervisor |
| *Innocentia Mpofana | Diagnostic Laboratory Manager |
| *Jaco Dreyer | Senior Research Data Manager |
| *Siyabonga Nxumalo | Research Data Manager |
| *Khadija Khan | Biorepository Manager |
| *Zizile Sikhosana | Somkhele Laboratory Supervisor |
| *Sashen Moodley | Microbiology Laboratory Supervisor |
| *Hollis Shen | Head: Exploratory Research Division |
| Kennedy Nyamande | Pulmonology Consultant |
| Mosa Suleman | Pulmonology Consultant |
| Jaikrishna Kalideen | Radiologist |
| Ramesh Jackpersad | Radiologist |
| Kgaugelo Moropane | Radiographer |
| Boitsholo Mfolo | Radiographer |
| Khabonina Malomane | Radiographer |
| Hlolisile Khumalo | Nursing Manager |
| Nompilo Buthelezi | Training Coordinator |
| Nozipho Mbonambi | Professional Nurse |
| Hloniphile Ngubane | Professional Nurse |
| Thokozani Simelane | Professional Nurse |
| Khanyisani Buthelezi | Professional Nurse |
| Sphiwe Ntuli | Professional Nurse |
| Nombuyiselo Zondi | Professional Nurse |
| Siboniso Nene | Professional Nurse |
| Bongumenzi Ndlovu | Enrolled Nurse |
| Talente Ntimbane | Enrolled Nurse |
| Mbali Mbuyisa | Enrolled Nurse |
| Xolani Mkhize | Enrolled Nurse |
| Melusi Sibiya | Enrolled Nurse |
| Ntombiyenkosi Ntombela | Enrolled Nurse |
| Mandisi Dlamini | Enrolled Nurse |
| Hlobisile Chonco | Enrolled Nurse |
| Hlengiwe Dlamini | Enrolled Nurse |
| Doctar Mlambo | Enrolled Nurse |
| Nonhlanhla Mzimela | Enrolled Nurse |
| Zinhle Buthelezi | Enrolled Nurse |
| Zinhle Mthembu | Enrolled Nurse |
| Thokozani Bhengu | Enrolled Nurse |
| Sandile Mthembu | Enrolled Nurse |
| Phumelele Mthethwa | Enrolled Nurse |
| Zamashandu Mbatha | Enrolled Nurse |
| Welcome Petros Mthembu | Enrolled Nurse |
| Anele Mkhwanazi | Clinical Research Assistant Supervisor |
| Mandlakayise Zikhali | Clinical Research Assistant Supervisor |
| Phakamani Mkhwanazi | Clinical Research Assistant |
| Ntombiyenhlanhla Mkhwanazi | Clinical Research Assistant |
| Rose Myeni | Clinical Research Assistant |
| Fezeka Mfeka | Clinical Research Assistant |
| Hlobisile Gumede | Clinical Research Assistant |
| Nonceba Mfeka | Clinical Research Assistant |
| Ayanda Zungu | Clinical Research Assistant |
| Hlobisile Gumede | Clinical Research Assistant |
| Nonhlanhla Mfekayi | Clinical Research Assistant |
| Smangaliso Zulu | Clinical Research Assistant |
| Mzamo Buthelezi | Clinical Research Assistant |
| Senzeni Mkhwanazi | Clinical Research Assistant |
| Mlungisi Dube | Clinical Research Assistant |
| Philippa Mathews | Clinical Governance |
| Siphephelo Dlamini | AHRI Nursing Manager |
| Hosea Kambonde | IT Systems Developer |
| Lindani Mthembu | Information Technology Assistant |
| Seneme Mchunu | Information Technology Assistant |
| Sibahle Gumbi | Research Admin Assistant |
| Tumi Madolo | Research Data Manager |
| Thengokwakhe Nkosi | Driver |
| Sibusiso Mkhwanazi | Driver |
| Sibusiso Nsibande | Driver |
| Mpumelelo Steto | Driver |
| Sibusiso Mhlongo | Driver |
| Velile Vellem | Driver |
| Pfarelo Tshivase | Driver |
| Jabu Kwinda | Driver |
| Bongani Magwaza | General Worker |
| Siyabonga Nsibande | General Worker |
| Skhumbuzo Mthombeni | General Worker |
| Sphiwe Clement Mthembu | General Worker |
| Antony Rapulana | Laboratory Technologist |
| Jade Cousins | Laboratory Technologist |
| Thabile Zondi | Laboratory Technologist |
| Nagavelli Padayachi | Laboratory Technologist |
| Freddy Mabetlela | Laboratory Technologist |
| Simphiwe Ntshangase | Laboratory Technician/LIMS Administrator |
| Nomfundo Luthuli | Laboratory Technician |
| Sithembile Ngcobo | Laboratory Technologist |
| Kayleen Brien | Laboratory Technologist |
| Sizwe Ndlela | Laboratory Technician |
| Nomfundo Ngema | Laboratory Technician |
| Nokukhanya Ntshakala | Laboratory Technician |
| Anupa Singh | Laboratory Technician |
| Rochelle Singh | Laboratory Technician |
| Logan Pillay | Laboratory Technician |
| Kandaseelan Chetty | Laboratory Technician |
| Ashentha Govender | Laboratory Technician |
| Pamela Ramkalawon | Laboratory Research Technician |
| Nondumiso Mabaso | Laboratory Intern |
| Kimeshree Perumal | Laboratory Intern |
| Senamile Makhari | Biorepository Laboratory Technician |
| Nondumiso Khuluse | Biorepository Laboratory Technician |
| Nondumiso Zitha | Biorepository Research Assistant |
| Hlengiwe Khathi | Biorepository Research Assistant |
| Mbuti Mofokeng | Clinical Specimen Driver/Laboratory Assistant |
| Nomathamsanqa Majozi | Public Engagement |
| Nceba Gqaleni | Public Engagement |
| Hannah Keal | Communications |
| Phumla Ngcobo | Communications |
| Costa Criticos | Operational Oversight |
| Raynold Zondo | Operational Oversight |
| Dilip Kalyan | Operational Oversight |
| Clive Mavimbela | Operational Oversight |
| Anand Ramnanan | Procurement |
| Sashin Harilall | Grants Office |
